# Supplementary material for: Multi-stimuli-responsive Zn(ii)-Schiff base complexes adjusted by rotatable aromatic rings
Source: Royal Society of Chemistry journal article supplement (doi:10.1039/d1dt02476k), 2021-01-01
Supplement: d1dt02476k1.pdf [file d1dt02476k1.pdf]

# Supporting Information

## Multi-stimuli-responsive Zn(II)-Schiff base complexes adjusted by rotatable aromatic rings

Han-Wen Zheng, Dong-Dong Yang, Qiong-Fang Liang, Xiang-Jun Zheng\*

Beijing Key Laboratory of Energy Conversion and Storage Materials, College of Chemistry, Beijing Normal University, Beijing, 100875, China.

**Corresponding author:**

Tel.: +86-10-58805522; fax: +86-10-58802075.

E-mail address: [xjzheng@bnu.edu.cn](mailto:xjzheng@bnu.edu.cn) (X. -J. Zheng)

# Contents

|                                                                                                                                                                                                                                                                                            |    |
|--------------------------------------------------------------------------------------------------------------------------------------------------------------------------------------------------------------------------------------------------------------------------------------------|----|
| <b>Figure S1.</b> The packing mode and multiple intermolecular interactions in (a) $\text{ZnL}^1_2$ , (b) $\text{ZnL}^{1a}_2$ and (c) $\text{ZnL}^2_2$ (C-H $\cdots\pi$ interactions: green, $\pi\cdots\pi$ stacking: red). .....                                                          | 3  |
| <b>Figure S2.</b> The molecular structures of (a) $\text{ZnL}^1_2$ , (b) $\text{ZnL}^{1a}_2$ and (c) $\text{ZnL}^2_2$ .....                                                                                                                                                                | 4  |
| <b>Figure S3.</b> Fluorescence decay curves and fit results of $\text{ZnL}^1_2$ in different states.....                                                                                                                                                                                   | 4  |
| <b>Figure S4.</b> DSC curves of $\text{ZnL}^1_2$ original, ground, fumed samples. ....                                                                                                                                                                                                     | 5  |
| <b>Figure S5.</b> (a) Fluorescence emission spectra (excited at 365 nm) and (b) PXRD patterns of $\text{ZnL}^1_2$ Fumed, FG, FGF samples, and $\text{ZnL}^{1a}_2$ fumed, (c) photographs of $\text{ZnL}^1_2$ Fumed, FG, and FGF samples under ambient light and UV (365 nm) light.....     | 5  |
| <b>Figure S6.</b> Fluorescence decay curves and fit results of $\text{ZnL}^{1a}_2$ in different states. ....                                                                                                                                                                               | 6  |
| <b>Figure S7.</b> DSC curves of $\text{ZnL}^{1a}_2$ original, ground, fumed samples. ....                                                                                                                                                                                                  | 6  |
| <b>Figure S8.</b> Fluorescence decay curves and fit results of $\text{ZnL}^2_2$ in different states.....                                                                                                                                                                                   | 7  |
| <b>Figure S9.</b> (a) Fluorescence emission spectra, and (b) emission switching characteristics of $\text{ZnL}^2_2$ upon repeating the grinding-fuming processes.....                                                                                                                      | 7  |
| <b>Figure S10.</b> DSC curves of $\text{ZnL}^2_2$ original, ground, fumed samples. ....                                                                                                                                                                                                    | 8  |
| <b>Figure S11.</b> (a) Fluorescence emission spectra (excited at 365 nm), (b) PXRD patterns of the $\text{HL}^1$ before and after grinding.....                                                                                                                                            | 8  |
| <b>Figure S12.</b> (a) Fluorescence emission spectra (excited at 365 nm), (b) PXRD patterns of the $\text{HL}^2$ before and after grinding.....                                                                                                                                            | 9  |
| <b>Figure S13.</b> PXRD patterns of Zn(II) complexes after HCl/NH <sub>3</sub> simulation: (a) $\text{ZnL}^1_2$ , (b) $\text{ZnL}^{1a}_2$ and (c) $\text{ZnL}^2_2$ .....                                                                                                                   | 9  |
| <b>Figure S14.</b> Fluorescence emission spectra of the original sample of (a) $\text{HL}^1$ , (b) $\text{HL}^2$ and the samples exposed to HCl/NH <sub>3</sub> vapor (excited at 365 nm), (c) photographs of the samples in different states under ambient light and UV light.....        | 10 |
| <b>Figure S15.</b> UV–Vis absorption spectra of the ligands ( $\text{HL}^1$ and $\text{HL}^2$ ), original crystals of Zn (II) complexes and the samples exposed to HCl/NH <sub>3</sub> vapor on solid state, (a) $\text{ZnL}^1_2$ , (b) $\text{ZnL}^{1a}_2$ and (c) $\text{ZnL}^2_2$ ..... | 10 |
| <b>Figure S16.</b> The normalized absorption spectra in ethanol of $\text{HL}^2$ and $\text{ZnL}^2_2$ and the leaching solution after the fumigation of HCl/NH <sub>3</sub> vapor.....                                                                                                     | 11 |
| <b>Figure S17.</b> XPS spectra of (a) O 1s, (b) $\text{HL}^2$ , (c) $\text{ZnL}^2_2$ -Original, (d) $\text{ZnL}^2_2$ -HCl and (e) $\text{ZnL}^2_2$ -HCl-NH <sub>3</sub> . ....                                                                                                             | 12 |
| <b>Figure S18.</b> Fluorescence emission spectra and photographs of $\text{ZnL}^2_2$ exposed to HCl (different concentration)/HAc vapor (excited at 365 nm).....                                                                                                                           | 13 |
| <b>Figure S19.</b> <sup>1</sup> H NMR of (a) $\text{HL}^1$ in DMSO- <i>d</i> <sub>6</sub> , (b) $\text{ZnL}^1_2$ and $\text{ZnL}^{1a}_2$ in THF- <i>d</i> <sub>8</sub> .....                                                                                                               | 14 |
| <b>Table S1.</b> Crystal data and structure refinement parameters of $\text{ZnL}^1_2$ , $\text{ZnL}^{1a}_2$ and $\text{ZnL}^2_2$ .....                                                                                                                                                     | 15 |
| <b>Table S2.</b> Selected Bond Distances (Å) and Angles (deg) of $\text{ZnL}^1_2$ , $\text{ZnL}^{1a}_2$ and $\text{ZnL}^2_2$ .....                                                                                                                                                         | 16 |
| <b>Table S3.</b> Types of intermolecular interactions and corresponding bond distances and angles in $\text{ZnL}^1_2$ , $\text{ZnL}^{1a}_2$ and $\text{ZnL}^2_2$ .....                                                                                                                     | 16 |
| <b>Table S4.</b> The dihedral angles between different planes in $\text{ZnL}^1_2$ , $\text{ZnL}^{1a}_2$ and $\text{ZnL}^2_2$ .....                                                                                                                                                         | 17 |
| <b>Table S5.</b> Detailed photophysical properties of Zn (II) complexes in different states.....                                                                                                                                                                                           | 17 |
| <b>Table S6.</b> Crystal data and structure refinement parameters of $\text{HL}^1$ and $\text{HL}^2$ .....                                                                                                                                                                                 | 18 |
| <b>Table S7.</b> The dihedral angles between different planes in $\text{HL}^1$ and $\text{HL}^2$ . ....                                                                                                                                                                                    | 19 |

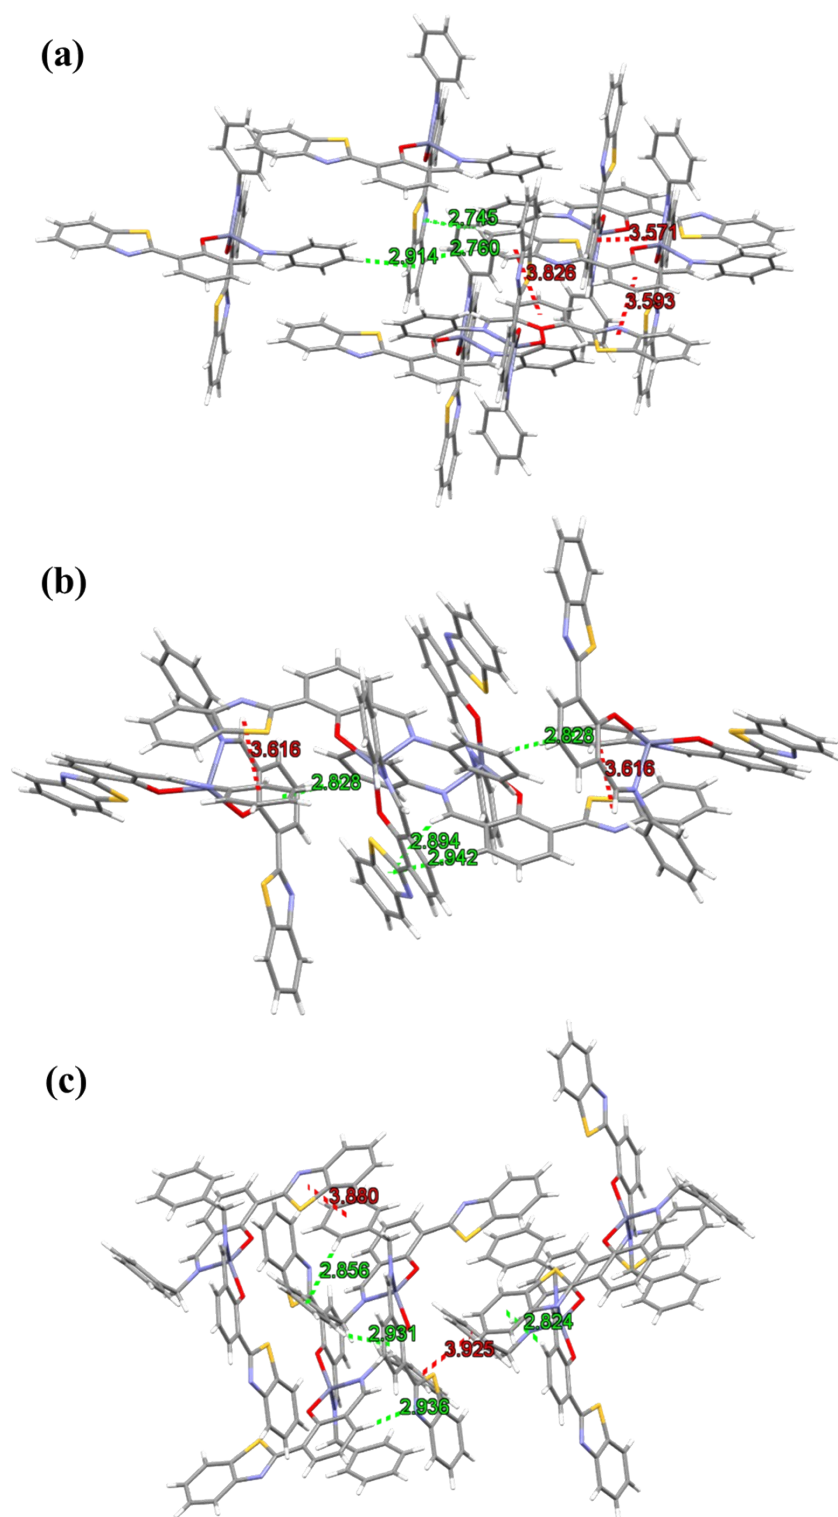

**Figure S1.** The packing mode and multiple intermolecular interactions in (a)  $\text{ZnL}^1_2$ , (b)  $\text{ZnL}^{1a}_2$  and (c)  $\text{ZnL}^2_2$  (C-H $\cdots$  $\pi$  interactions: green,  $\pi\cdots\pi$  stacking: red).

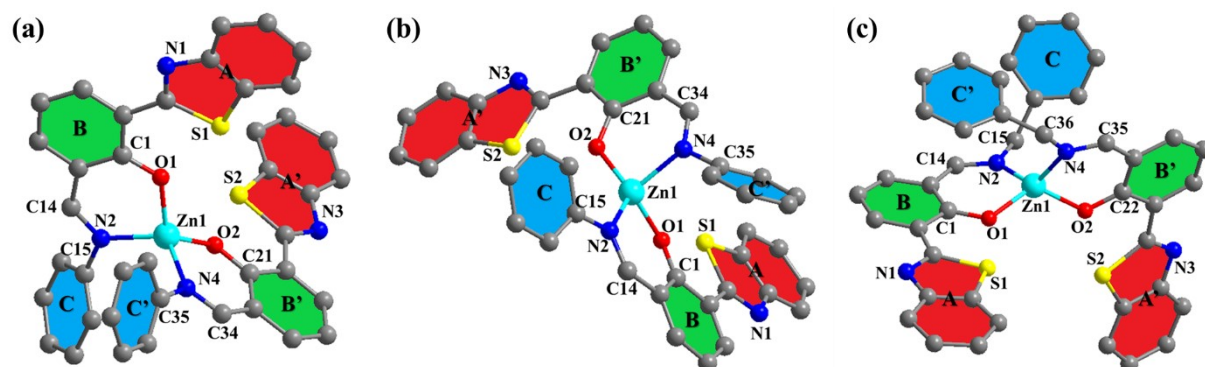

**Figure S2.** The molecular structures of (a)  $\text{ZnL}^1_2$ , (b)  $\text{ZnL}^{1a}_2$  and (c)  $\text{ZnL}^2_2$ .

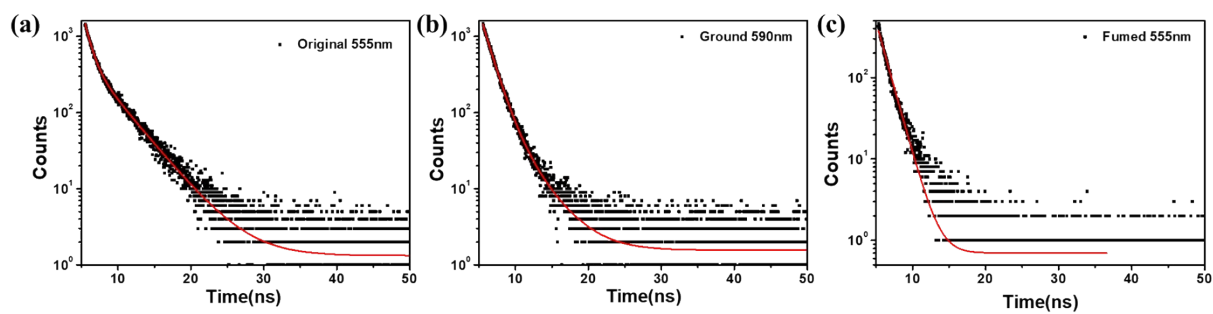

**Figure S3.** Fluorescence decay curves and fit results of  $\text{ZnL}^1_2$  in different states (excited at 371.8 nm): (a) Original sample monitored at 555 nm, (b) Ground sample monitored at 590 nm, (c) Fumed sample monitored at 555 nm.

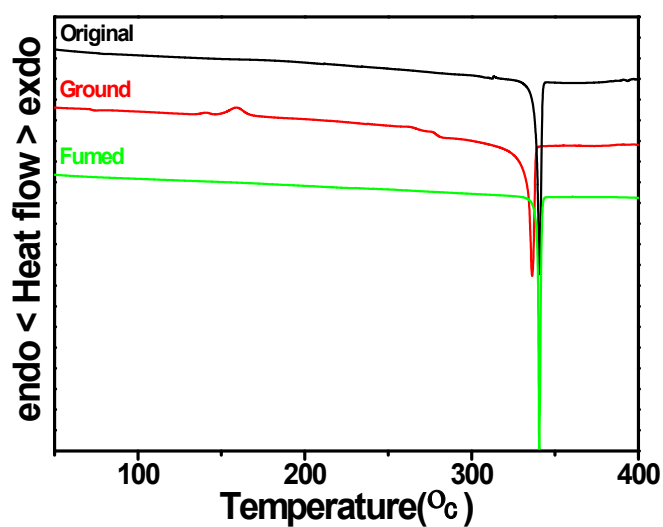

**Figure S4.** DSC curves of  $\text{ZnL}^1_2$  original, ground, fumed samples.

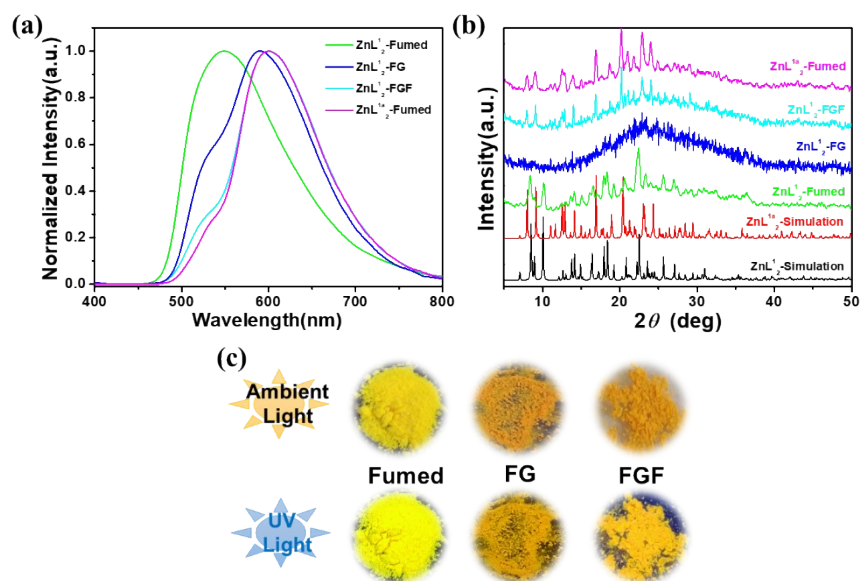

**Figure S5.** (a) Fluorescence emission spectra (excited at 365 nm) and (b) PXRD patterns of  $\text{ZnL}^1_2$  Fumed, FG, FGF samples, and  $\text{ZnL}^{1a}_2$  fumed, (c) photographs of  $\text{ZnL}^1_2$  Fumed, FG, and FGF samples under ambient light and UV (365 nm) light.

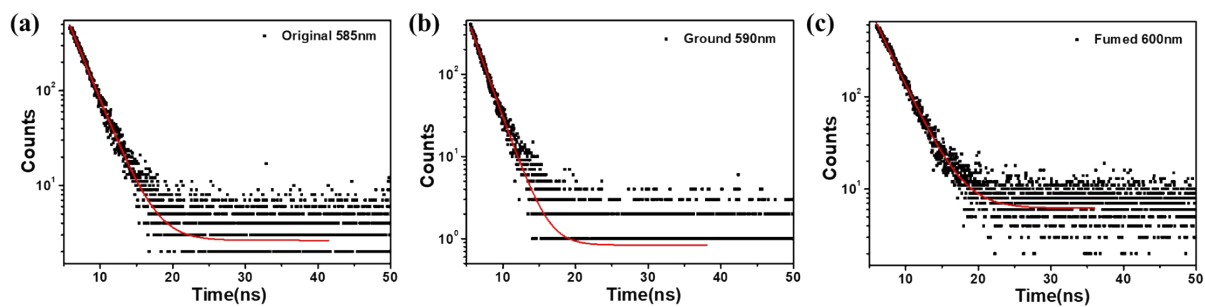

**Figure S6.** Fluorescence decay curves and fit results of  $\text{ZnL}^{1a_2}$  in different states (excited at 371.8 nm): (a) Original sample monitored at 585 nm, (b) Ground sample monitored at 590 nm, (c) Fumed sample monitored at 600 nm.

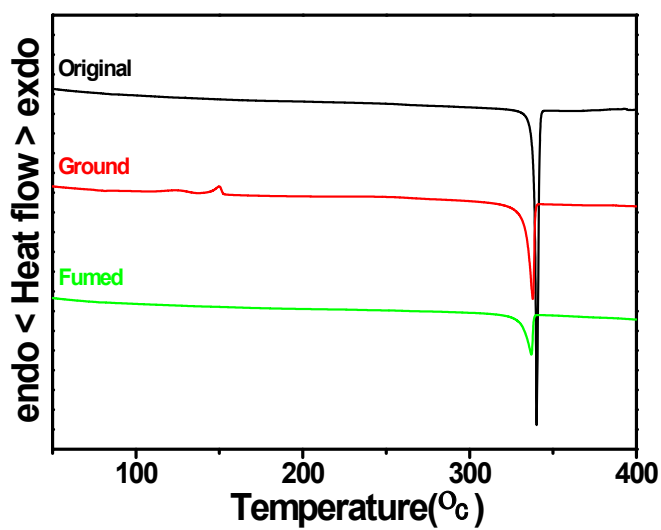

**Figure S7.** DSC curves of  $\text{ZnL}^{1a_2}$  original, ground, fumed samples.

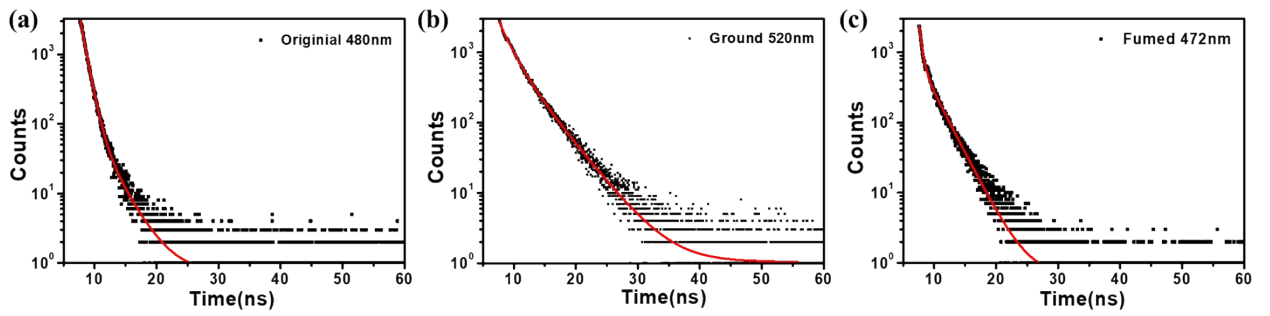

**Figure S8.** Fluorescence decay curves and fit results of  $\text{ZnL}_2$  in different states (excited at 371.8 nm): (a) Original sample monitored at 480 nm, (b) Ground sample monitored at 520 nm, (c) Fumed sample monitored at 472 nm.

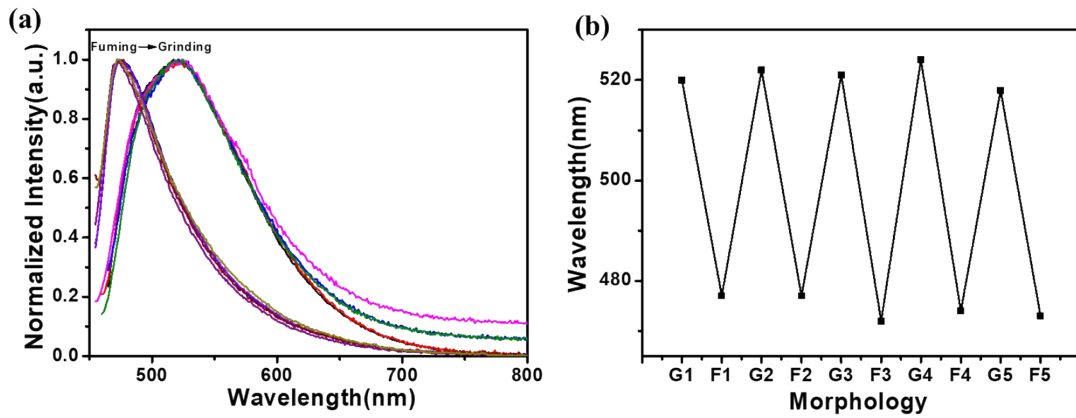

**Figure S9.** (a) Fluorescence emission spectra, and (b) emission switching characteristics of  $\text{ZnL}_2$  upon repeating the grinding-fuming processes.

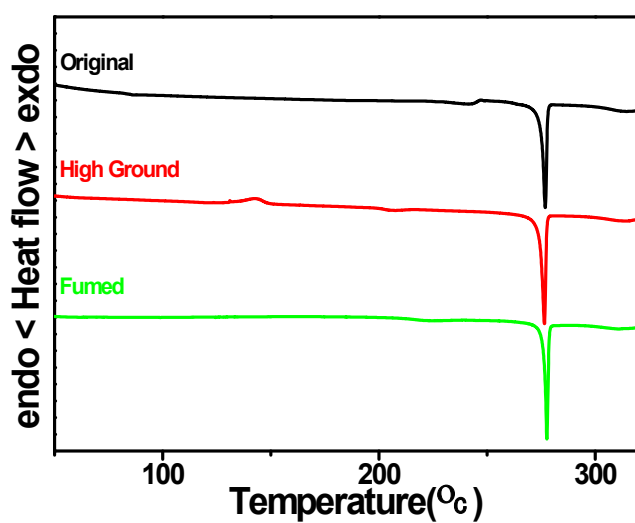

**Figure S10.** DSC curves of  $\text{ZnL}^2_2$  original, high ground, fumed samples.

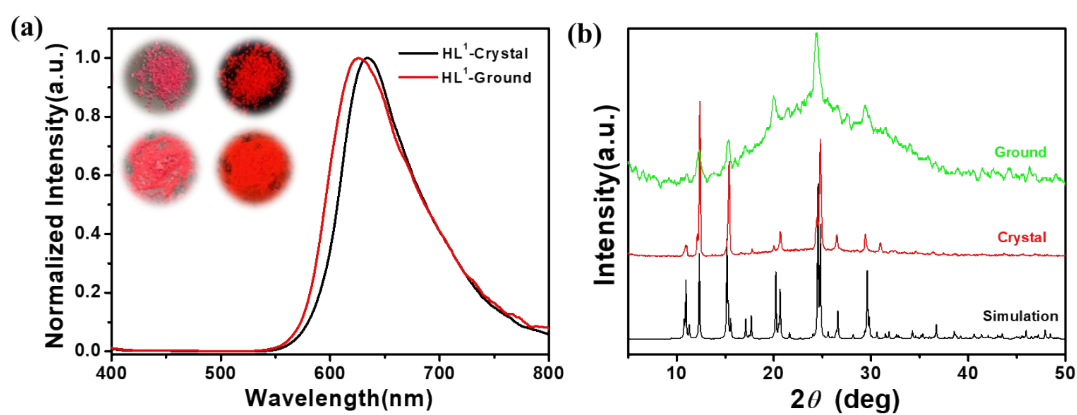

**Figure S11.** (a) Fluorescence emission spectra (excited at 365 nm), (b) PXRD patterns of the  $\text{HL}^1$  before and after grinding. (Insert photographs: the  $\text{HL}^1$  samples under ambient light and UV light).



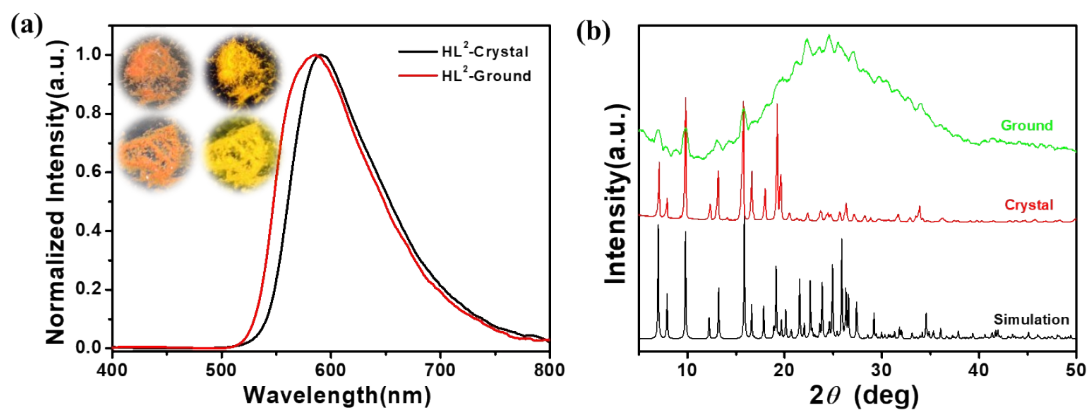

**Figure S12.** (a) Fluorescence emission spectra (excited at 365 nm), (b) PXRD patterns of the  $HL^2$  before and after grinding. (Insert photographs: the  $HL^2$  samples under ambient light and UV light).

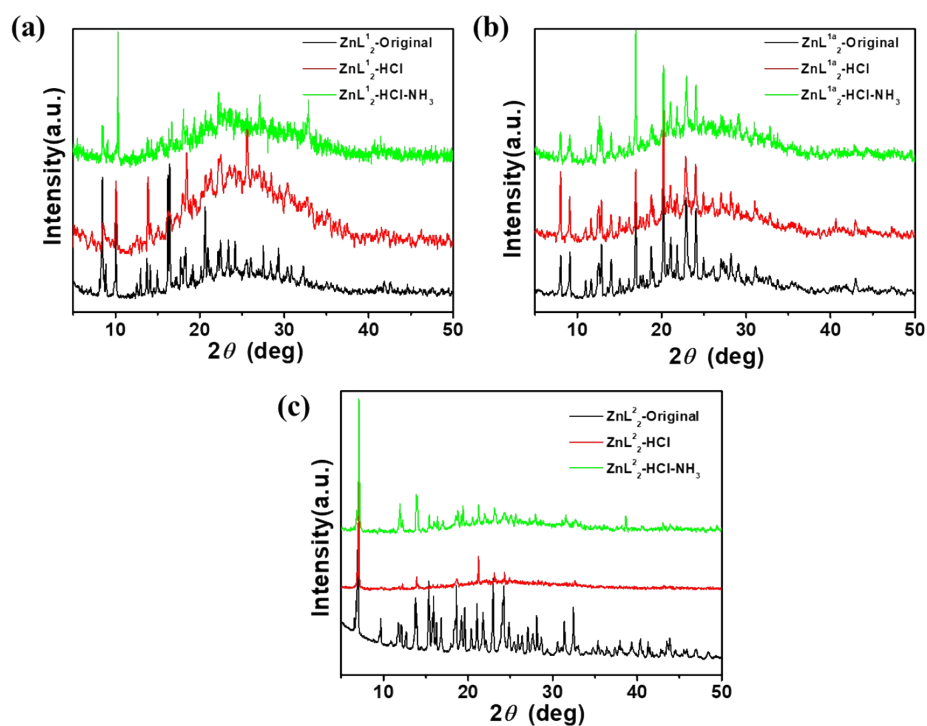

**Figure S13.** PXRD patterns of Zn(II) complexes after HCl/ $NH_3$  simulation: (a)  $ZnL^1_2$ , (b)  $ZnL^{1a}_2$  and (c)  $ZnL^2_2$ .

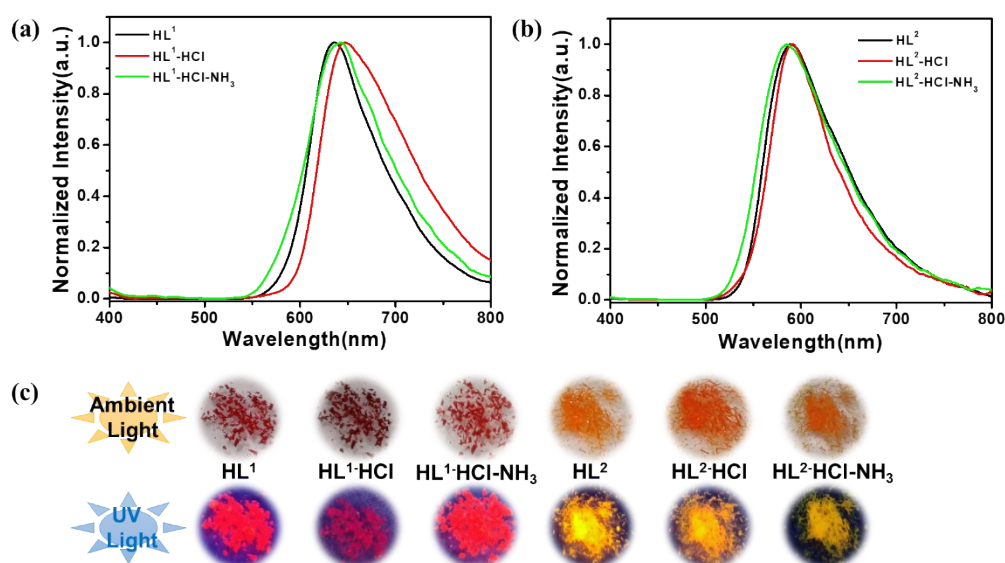

**Figure S14.** Fluorescence emission spectra of the original sample of (a) HL<sup>1</sup>, (b) HL<sup>2</sup> and the samples exposed to HCl/NH<sub>3</sub> vapor (excited at 365 nm), (c) photographs of the samples in different states under ambient light and UV light.

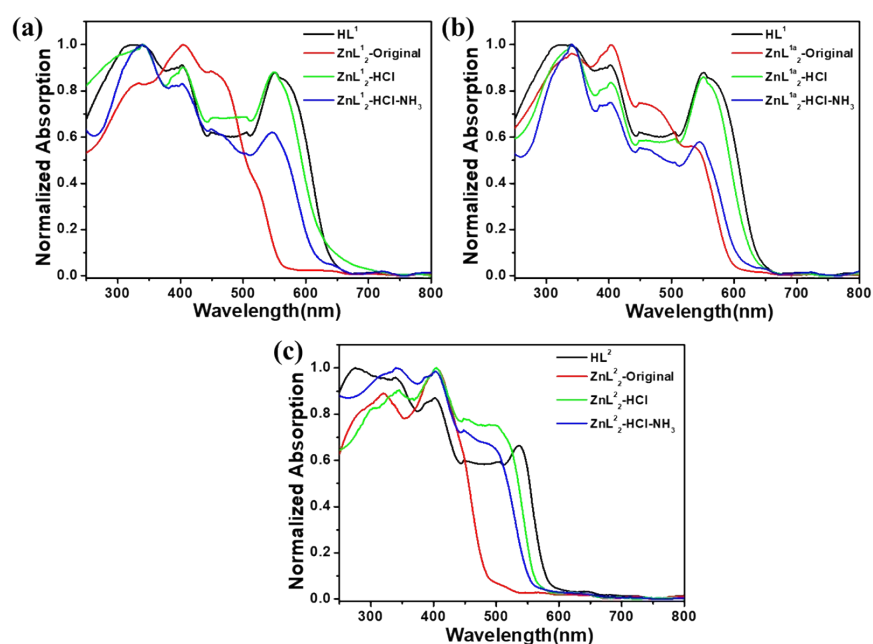

**Figure S15.** UV-Vis absorption spectra of the ligands (HL<sup>1</sup> and HL<sup>2</sup>), original crystals of Zn (II) complexes and the samples exposed to HCl/NH<sub>3</sub> vapor on solid state, (a) ZnL<sub>2</sub><sup>1</sup>, (b) ZnL<sub>2</sub><sup>1a</sup> and (c) ZnL<sub>2</sub><sup>2</sup>.

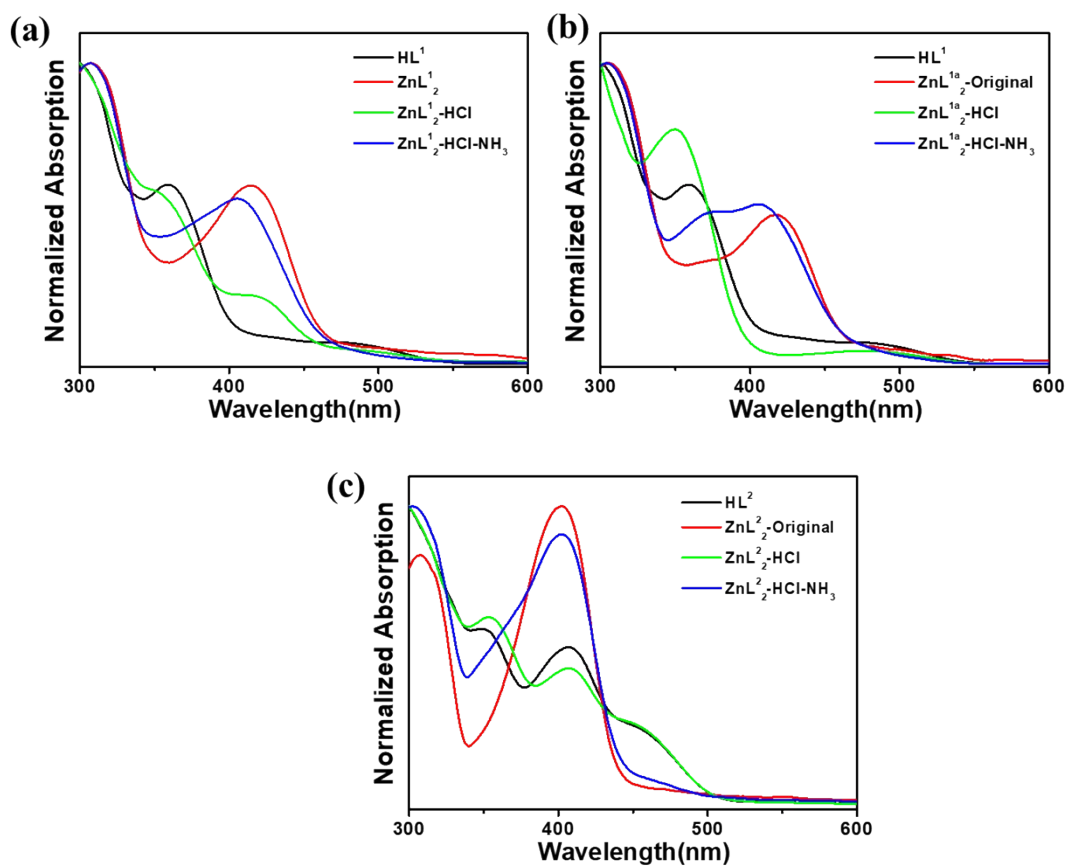

**Figure S16.** The normalized absorption spectra in ethanol of  $HL^2$  and  $ZnL^2_2$  and the leaching solution after the fumigation of  $HCl/NH_3$  vapor.

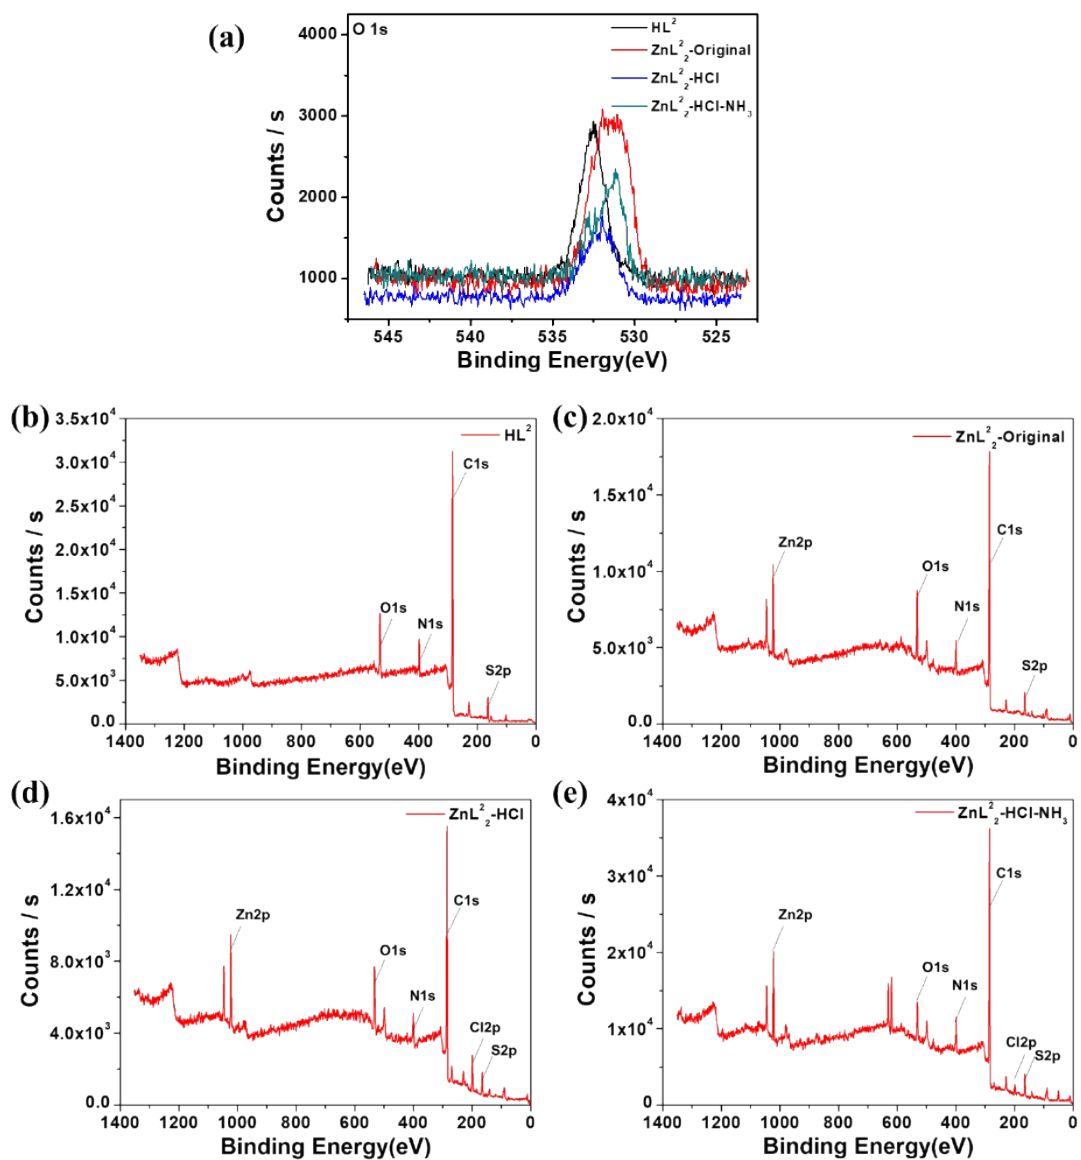

**Figure S17.** XPS spectra of (a) O 1s, (b)  $HL^2$ , (c)  $ZnL^2_2$ -Original, (d)  $ZnL^2_2$ -HCl and (e)  $ZnL^2_2$ -HCl- $NH_3$ .

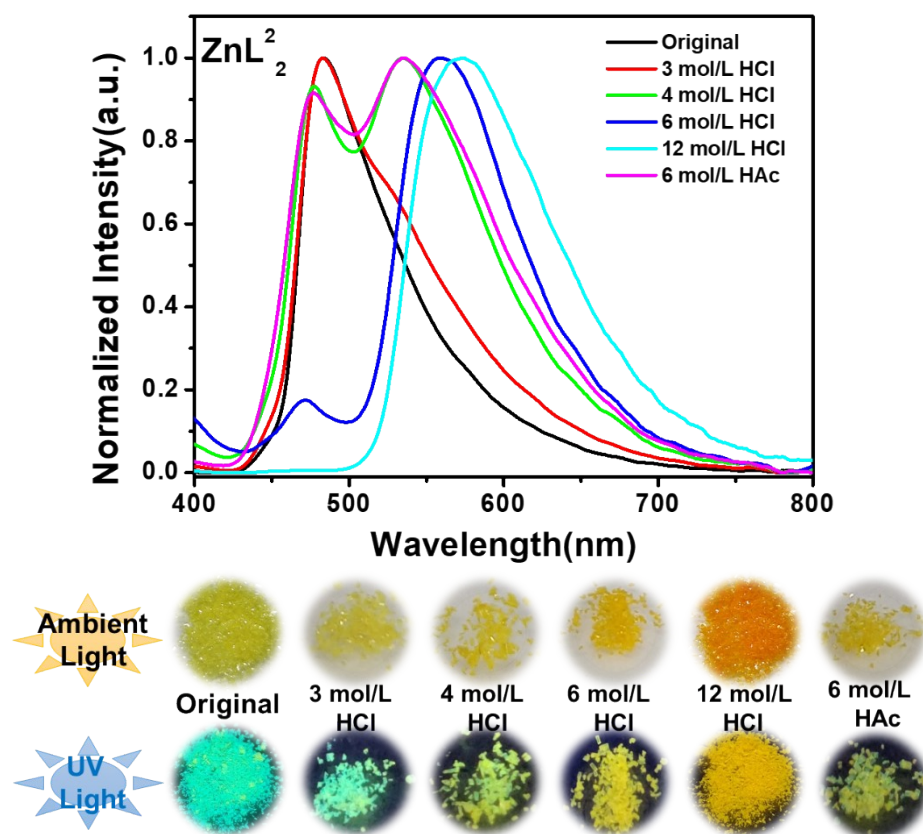

**Figure S18.** Fluorescence emission spectra of the original crystals of  $ZnL_2$  and the samples exposed to HCl (different concentration)/HAc vapor (excited at 365 nm), photographs of the under ambient light and UV (365 nm) light.

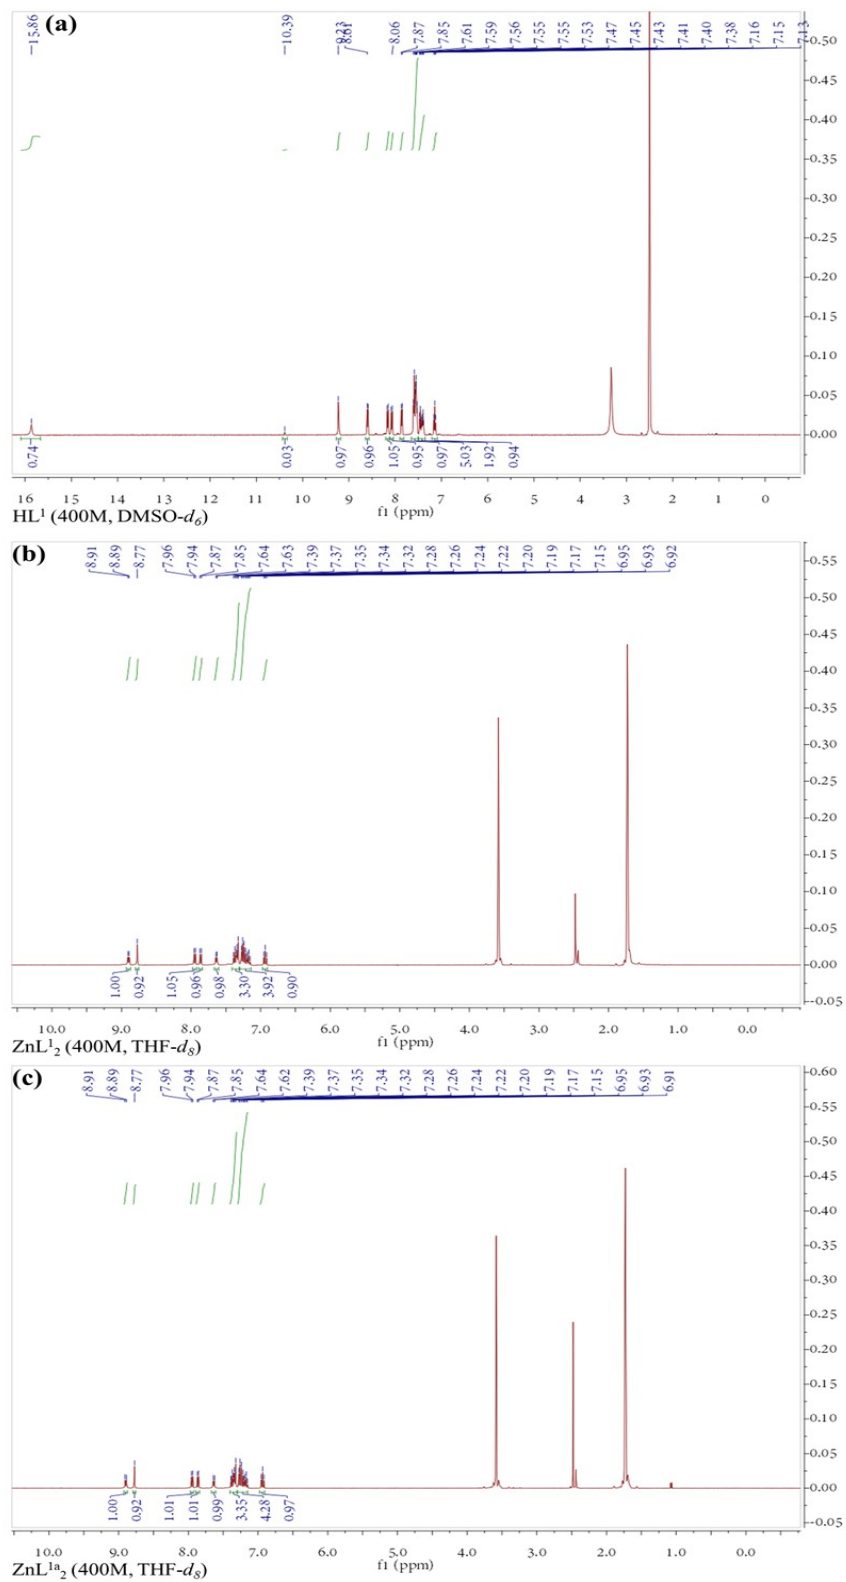

**Figure S19.** <sup>1</sup>H NMR of (a) HL<sup>1</sup> in DMSO-*d*<sub>6</sub>, (b) ZnL<sub>2</sub> and ZnL<sup>1a</sup><sub>2</sub> in THF-*d*<sub>8</sub>.

**Table S1.** Crystal data and structure refinement parameters of **ZnL<sup>1</sup><sub>2</sub>**, **ZnL<sup>1a</sup><sub>2</sub>** and **ZnL<sup>2</sup><sub>2</sub>**.

| Compound                                     | <b>ZnL<sup>1</sup><sub>2</sub></b>                                              | <b>ZnL<sup>1a</sup><sub>2</sub></b>                                             | <b>ZnL<sup>2</sup><sub>2</sub></b>                                              |
|----------------------------------------------|---------------------------------------------------------------------------------|---------------------------------------------------------------------------------|---------------------------------------------------------------------------------|
| Formula                                      | C <sub>40</sub> H <sub>26</sub> N <sub>4</sub> O <sub>2</sub> S <sub>2</sub> Zn | C <sub>40</sub> H <sub>26</sub> N <sub>4</sub> O <sub>2</sub> S <sub>2</sub> Zn | C <sub>42</sub> H <sub>30</sub> N <sub>4</sub> O <sub>2</sub> S <sub>2</sub> Zn |
| Fw                                           | 724.14                                                                          | 724.21                                                                          | 752.19                                                                          |
| T (K)                                        | 100.00(10)                                                                      | 100.00(10)                                                                      | 99.99(10)                                                                       |
| Crystal system                               | Triclinic                                                                       | Monoclinic                                                                      | Triclinic                                                                       |
| Space group                                  | <i>P</i> $\bar{1}$                                                              | <i>P</i> 2 <sub>1</sub> / <i>c</i>                                              | <i>P</i> $\bar{1}$                                                              |
| <i>a</i> (Å)                                 | 11.4929(5)                                                                      | 13.1878(3)                                                                      | 9.16130(17)                                                                     |
| <i>b</i> (Å)                                 | 12.7136(5)                                                                      | 15.1875(3)                                                                      | 14.4849(3)                                                                      |
| <i>c</i> (Å)                                 | 13.8590(4)                                                                      | 16.8527(4)                                                                      | 14.8515(3)                                                                      |
| $\alpha$ (°)                                 | 66.694(4)                                                                       | 90                                                                              | 118.3611(19)                                                                    |
| $\beta$ (°)                                  | 89.324(3)                                                                       | 108.139(2)                                                                      | 94.9008(16)                                                                     |
| $\gamma$ (°)                                 | 65.169(4)                                                                       | 90                                                                              | 96.0026(15)                                                                     |
| V (Å <sup>3</sup> )                          | 1658.66(13)                                                                     | 3207.68(13)                                                                     | 1704.06(6)                                                                      |
| Z                                            | 2                                                                               | 4                                                                               | 2                                                                               |
| Calculated density (gem <sup>-3</sup> )      | 1.450                                                                           | 1.500                                                                           | 1.466                                                                           |
| <i>F</i> (000)                               | 744.0                                                                           | 1488.2                                                                          | 776.0                                                                           |
| Reflections Collected/Unique                 | 20225/6587                                                                      | 23215/6393                                                                      | 23231/6862                                                                      |
| Goodness-of-fit on <i>F</i> <sup>2</sup>     | 1.058                                                                           | 1.026                                                                           | 1.068                                                                           |
| Final R indexes [ <i>I</i> ≥ 2σ( <i>I</i> )] | R <sub>1</sub> = 0.0437,<br>wR <sub>2</sub> = 0.1169                            | R <sub>1</sub> = 0.0381,<br>wR <sub>2</sub> = 0.1037                            | R <sub>1</sub> = 0.0352,<br>wR <sub>2</sub> = 0.0944                            |
| R indices (all data)                         | R <sub>1</sub> = 0.0499,<br>wR <sub>2</sub> = 0.1211                            | R <sub>1</sub> = 0.0423,<br>wR <sub>2</sub> = 0.1086                            | R <sub>1</sub> = 0.0372,<br>wR <sub>2</sub> = 0.0963                            |
| CCDC number                                  | 2099170                                                                         | 2099171                                                                         | 2055758                                                                         |

**Table S2.** Selected Bond Distances (Å) and Angles (deg) of **ZnL<sup>1</sup><sub>2</sub>**, **ZnL<sup>1a</sup><sub>2</sub>** and **ZnL<sup>2</sup><sub>2</sub>**.

|            | <b>ZnL<sup>1</sup><sub>2</sub></b> | <b>ZnL<sup>1a</sup><sub>2</sub></b> | <b>ZnL<sup>2</sup><sub>2</sub></b> |
|------------|------------------------------------|-------------------------------------|------------------------------------|
| Zn1—O1     | 1.9173 (17)                        | 1.9306 (15)                         | 1.9308 (12)                        |
| Zn1—O2     | 1.9142 (17)                        | 1.9045 (15)                         | 1.9428 (12)                        |
| Zn1—N2     | 2.015 (2)                          | 1.9845 (18)                         | 2.0080 (14)                        |
| Zn1—N4     | 2.009 (2)                          | 2.0187 (18)                         | 2.0006 (14)                        |
| O2—Zn1—O1  | 120.67 (7)                         | 119.62 (6)                          | 124.30 (5)                         |
| N2—Zn1—O1  | 96.01 (8)                          | 96.60 (7)                           | 95.06 (5)                          |
| N2—Zn1—O2  | 116.80 (8)                         | 126.20 (7)                          | 108.65 (6)                         |
| N2—Zn1—N4  | 116.03 (8)                         | 114.49 (7)                          | 127.70 (6)                         |
| N4—Zn1—O1  | 113.46 (8)                         | 103.45 (7)                          | 109.97 (6)                         |
| N4—Zn1—O2  | 95.37 (8)                          | 95.35 (7)                           | 94.24 (5)                          |
| C1—O1—Zn1  | 126.15 (15)                        | 122.85 (13)                         | 124.38 (10)                        |
| C21—O2—Zn1 | 126.59 (15)                        | 125.22 (13)                         | —                                  |
| C14—N2—Zn1 | 120.55 (17)                        | 119.70 (15)                         | 120.60 (12)                        |
| C15—N2—Zn1 | 122.68 (16)                        | 119.61 (14)                         | 121.62 (11)                        |
| C34—N4—Zn1 | 121.74 (16)                        | 120.27 (15)                         | —                                  |
| C35—N4—Zn1 | 119.93 (16)                        | 117.82 (14)                         | 120.62 (12)                        |
| C36—N4—Zn1 | —                                  | —                                   | 120.61 (11)                        |
| C22—O2—Zn1 | —                                  | —                                   | 123.48 (11)                        |

**Table S3.** Types of intermolecular interactions and corresponding bond distances and angles in **ZnL<sup>1</sup><sub>2</sub>**, **ZnL<sup>1a</sup><sub>2</sub>** and **ZnL<sup>2</sup><sub>2</sub>**.

| compound                            | interactions                                                                                                               | bond distances | angles  |
|-------------------------------------|----------------------------------------------------------------------------------------------------------------------------|----------------|---------|
| <b>ZnL<sup>1</sup><sub>2</sub></b>  | C <sub>9</sub> -H <sub>9</sub> ⋯π(C <sub>15</sub> -C <sub>20</sub> )                                                       | 2.760 Å        | 141.47° |
|                                     | C <sub>31</sub> -H <sub>31</sub> ⋯π(S <sub>1</sub> ,C <sub>7</sub> ,N <sub>1</sub> ,C <sub>8</sub> ,C <sub>13</sub> )      | 2.745 Å        | 145.92° |
|                                     | C <sub>38</sub> -H <sub>38</sub> ⋯π(C <sub>8</sub> -C <sub>13</sub> )                                                      | 2.914 Å        | 129.63° |
|                                     | π(C <sub>21</sub> -C <sub>26</sub> )⋯π(S <sub>2</sub> ,C <sub>27</sub> ,N <sub>3</sub> ,C <sub>28</sub> ,C <sub>33</sub> ) | 3.593 Å        |         |
|                                     | π(C <sub>1</sub> -C <sub>6</sub> )⋯π(C <sub>1</sub> -C <sub>6</sub> )                                                      | 3.571 Å        |         |
|                                     | π(C <sub>21</sub> -C <sub>26</sub> )⋯π(C <sub>28</sub> -C <sub>33</sub> )                                                  | 3.826 Å        |         |
| <b>ZnL<sup>1a</sup><sub>2</sub></b> | C <sub>23</sub> -H <sub>23</sub> ⋯π(S <sub>1</sub> ,C <sub>7</sub> ,N <sub>1</sub> ,C <sub>8</sub> ,C <sub>13</sub> )      | 2.942 Å        | 154.85° |
|                                     | C <sub>34</sub> -H <sub>34</sub> ⋯π(S <sub>1</sub> ,C <sub>7</sub> ,N <sub>1</sub> ,C <sub>8</sub> ,C <sub>13</sub> )      | 2.894 Å        | 156.06° |
|                                     | C <sub>39</sub> -H <sub>39</sub> ⋯π(C <sub>21</sub> -C <sub>26</sub> )                                                     | 2.828 Å        | 139.52° |
|                                     | π(C <sub>15</sub> -C <sub>20</sub> )⋯π(S <sub>2</sub> ,C <sub>27</sub> ,N <sub>3</sub> ,C <sub>28</sub> ,C <sub>33</sub> ) | 3.616 Å        |         |
| <b>ZnL<sup>2</sup><sub>2</sub></b>  | C <sub>3</sub> -H <sub>3</sub> ⋯π(S <sub>2</sub> ,C <sub>28</sub> ,N <sub>3</sub> ,C <sub>29</sub> ,C <sub>34</sub> )      | 2.936 Å        | 170.33° |
|                                     | C <sub>17</sub> -H <sub>17</sub> ⋯π(C <sub>22</sub> -C <sub>27</sub> )                                                     | 2.931 Å        | 142.06° |
|                                     | C <sub>24</sub> -H <sub>24</sub> ⋯π(C <sub>8</sub> -C <sub>13</sub> )                                                      | 2.824 Å        | 162.18° |
|                                     | C <sub>38</sub> -H <sub>38</sub> ⋯π(C <sub>16</sub> -C <sub>21</sub> )                                                     | 2.856 Å        | 131.00° |



|                                                                                                        |         |
|--------------------------------------------------------------------------------------------------------|---------|
| $\pi(\text{C}_{37}\text{-C}_{42})\cdots\pi(\text{S}_1,\text{C}_7,\text{N}_1,\text{C}_8,\text{C}_{13})$ | 3.880 Å |
| $\pi(\text{C}_{16}\text{-C}_{21})\cdots\pi(\text{C}_{16}\text{-C}_{21})$                               | 3.925 Å |

**Table S4.** The dihedral angles between different planes in  $\text{ZnL}^1_2$ ,  $\text{ZnL}^{1a}_2$  and  $\text{ZnL}^2_2$ .

|              | $\text{ZnL}^1_2$ | $\text{ZnL}^{1a}_2$ | $\text{ZnL}^2_2$ |
|--------------|------------------|---------------------|------------------|
| <b>A/B</b>   | 7.10             | 8.06                | 2.69             |
| <b>B/C</b>   | 55.98            | 27.83               | 74.22            |
| <b>A/C</b>   | 59.37            | 35.49               | 71.76            |
| <b>A'/B'</b> | 3.91             | 10.44               | 12.09            |
| <b>B'/C'</b> | 50.23            | 61.02               | 84.88            |
| <b>A'/C'</b> | 50.09            | 57.56               | 78.48            |

**Table S5.** Detailed photophysical properties of Zn (II) complexes in different states.

|                                            | $\tau_1$ (ns) <sup>a</sup> | $A_1$ <sup>b</sup> | $\tau_2$ (ns) <sup>a</sup> | $A_2$ <sup>b</sup> |
|--------------------------------------------|----------------------------|--------------------|----------------------------|--------------------|
| ZnL <sup>1</sup> <sub>2</sub> -Original    | 0.85                       | 0.33               | 3.78                       | 0.67               |
| ZnL <sup>1</sup> <sub>2</sub> -Ground      | 1.28                       | 0.80               | 3.28                       | 0.20               |
| ZnL <sup>1</sup> <sub>2</sub> -Fumed       | 1.34                       | 1.00               | -                          | -                  |
| ZnL <sup>1a</sup> <sub>2</sub> -Original   | 2.28                       | 1.00               | -                          | -                  |
| ZnL <sup>1a</sup> <sub>2</sub> -Ground     | 1.75                       | 1.00               | -                          | -                  |
| ZnL <sup>1a</sup> <sub>2</sub> -Fumed      | 2.58                       | 1.00               | -                          | -                  |
| ZnL <sup>2</sup> <sub>2</sub> -Original    | 0.86                       | 0.87               | 2.75                       | 0.13               |
| ZnL <sup>2</sup> <sub>2</sub> -High ground | 1.67                       | 0.39               | 3.97                       | 0.61               |
| ZnL <sup>2</sup> <sub>2</sub> -Fumed       | 0.46                       | 0.31               | 2.52                       | 0.69               |

**Table S6.** Crystal data and structure refinement parameters of **HL<sup>1</sup>** and **HL<sup>2</sup>**.

| Compound                                      | <b>HL<sup>1</sup></b>                             | <b>HL<sup>2</sup></b>                             |
|-----------------------------------------------|---------------------------------------------------|---------------------------------------------------|
| Formula                                       | C <sub>20</sub> H <sub>14</sub> N <sub>2</sub> OS | C <sub>21</sub> H <sub>16</sub> N <sub>2</sub> OS |
| Fw                                            | 330.39                                            | 344.42                                            |
| T (K)                                         | 100.00(10)                                        | 150.00(10)                                        |
| Crystal system                                | Monoclinic                                        | Monoclinic                                        |
| Space group                                   | <i>P2<sub>1</sub>/c</i>                           | <i>P2<sub>1</sub>/n</i>                           |
| <i>a</i> (Å)                                  | 10.8786(5)                                        | 4.81310(10)                                       |
| <i>b</i> (Å)                                  | 14.3556(6)                                        | 22.3451(3)                                        |
| <i>c</i> (Å)                                  | 11.6830(11)                                       | 15.3199(2)                                        |
| $\alpha$ (°)                                  | 90                                                | 90                                                |
| $\beta$ (°)                                   | 120.899(4)                                        | 93.7770(10)                                       |
| $\gamma$ (°)                                  | 90                                                | 90                                                |
| V (Å <sup>3</sup> )                           | 1565.57(19)                                       | 1644.06(5)                                        |
| Z                                             | 4                                                 | 4                                                 |
| Calculated density (gcm <sup>-3</sup> )       | 1.402                                             | 1.391                                             |
| <i>F</i> (000)                                | 688.0                                             | 720.0                                             |
| Reflections Collected/Unique                  | 9713/3132                                         | 15079/3385                                        |
| Goodness-of-fit on F <sup>2</sup>             | 1.091                                             | 1.049                                             |
| Final R indexes [ <i>I</i> >= 2σ( <i>I</i> )] | R <sub>1</sub> =0.0671, wR <sub>2</sub> =0.1696   | R <sub>1</sub> =0.0423, wR <sub>2</sub> =0.1112   |
| R indices (all data)                          | R <sub>1</sub> =0.0744, wR <sub>2</sub> =0.1745   | R <sub>1</sub> =0.0452, wR <sub>2</sub> =0.1145   |
| CCDC number                                   | 2099172                                           | 2046924                                           |

**Table S7.** The dihedral angles between different planes in **HL<sup>1</sup>** and **HL<sup>2</sup>**.

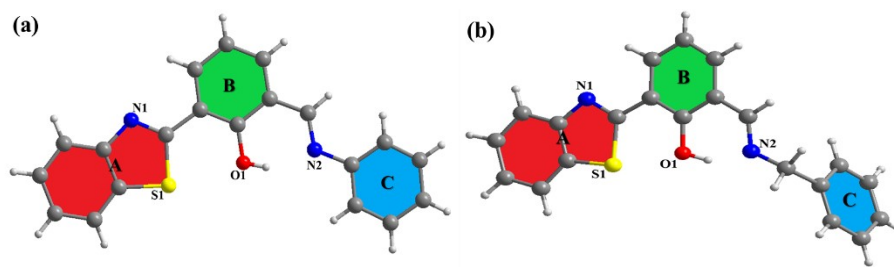

|                       | A/B  | B/C   | A/C   |
|-----------------------|------|-------|-------|
| <b>HL<sup>1</sup></b> | 5.76 | 7.15  | 11.70 |
| <b>HL<sup>2</sup></b> | 2.10 | 85.16 | 83.93 |
